# Supplementary material for: Nuclear EGFR and Integrator/Super Elongation Complex concurrently binds to Immediate Early Genes for gene transactivation
Source: PubMed Central journal article supplement — J Cancer. 2018 Jan 1;9(1):108–16. doi: 10.7150/jca.21925 (PMC5743717; doi:10.7150/jca.21925), 2018-01-01
Supplement: jcav09p0108s1.pdf [file jcav09p0108s1.pdf]

### Figure S1:

Normalized binding density before and after EGF stimulation. Four distinct gene clusters shown in Figure 2 (clustering analysis) were used to plot the average profiles and heatmaps herein to show the binding signals before and after EGF stimulation. Top panel: average profiles of normalized protein bindings across genes in each cluster. The differential bindings of proteins compared to input control are shown in log<sub>2</sub>(FC) scale. A positive number means an increase of chromatin binding compared to input control. Bottom panel: heatmaps of normalized binding of proteins across genes. The gene body with additional 5kb from TSS and TTS are shown in the x-axis. Concurrent recruitment of proteins in gene cluster 1 is specific to EGF treatment.

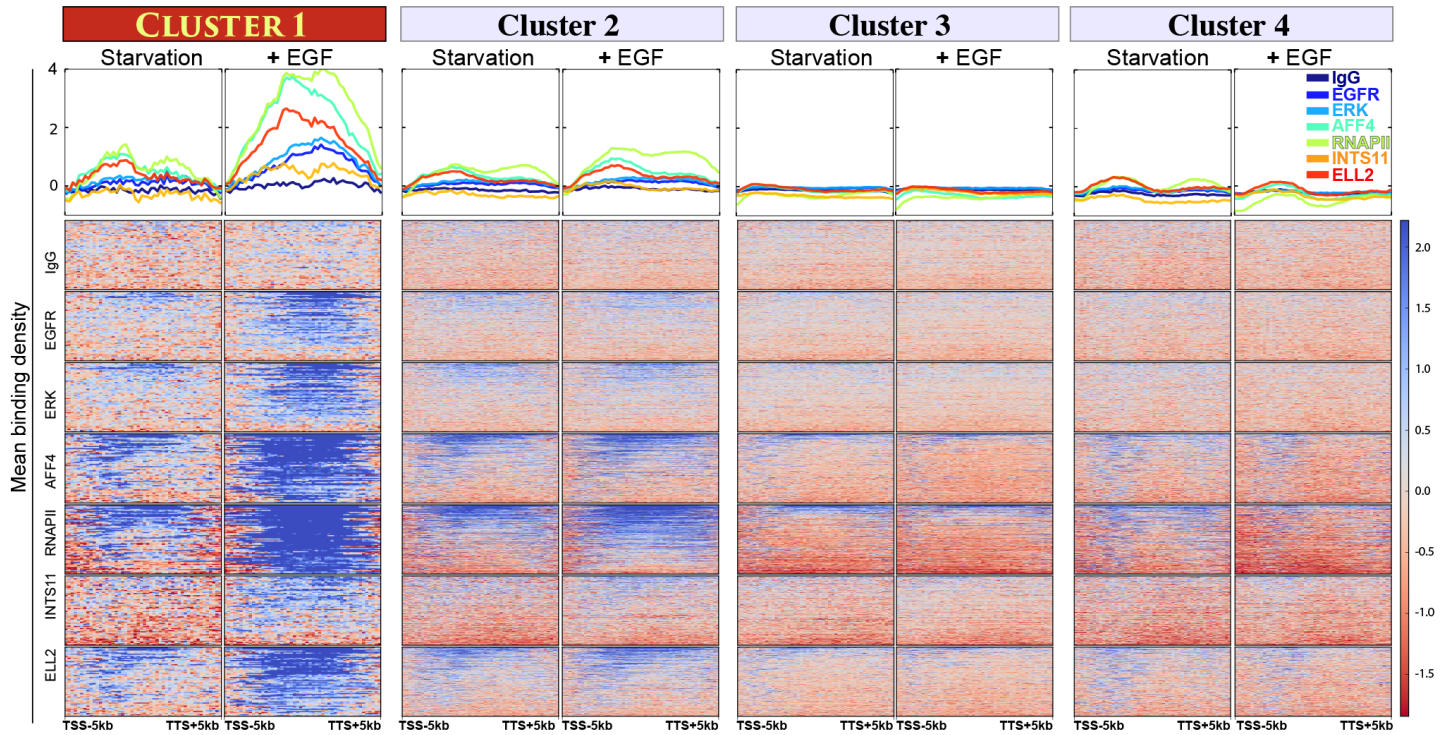

### Figure S2:

Genome browser visualization of ChIP-seq and RNA-seq signals. Genes highlighted in yellow are the nEGFR target genes identified in the BETA analysis (i.e. *JUN*, *EGR1*, *FOS*, *IER2*, *DUSP1*, *DUSP2*, *DUSP5*, *FOSL1*, *JUNB*, *KLF2*, *CCNL1*, and *RHOB*). Genes highlighted in red indicate the genes with moderate recruitment of EGFR, as inspected in genome browser (i.e. *FOSB*, *N4A1*, *N4A3*, and *ZFP36*). Genes with no recruitment of EGFR are highlighted in green. They are negative control for comparison (i.e. *ZFP36L1*, *DUSP3*, and *DUSP8*). For each gene, the scales are the same for all the visualized ChIP-seq tracks and RNA-seq tracks.

### **[JUN]** - nEGFR target gene

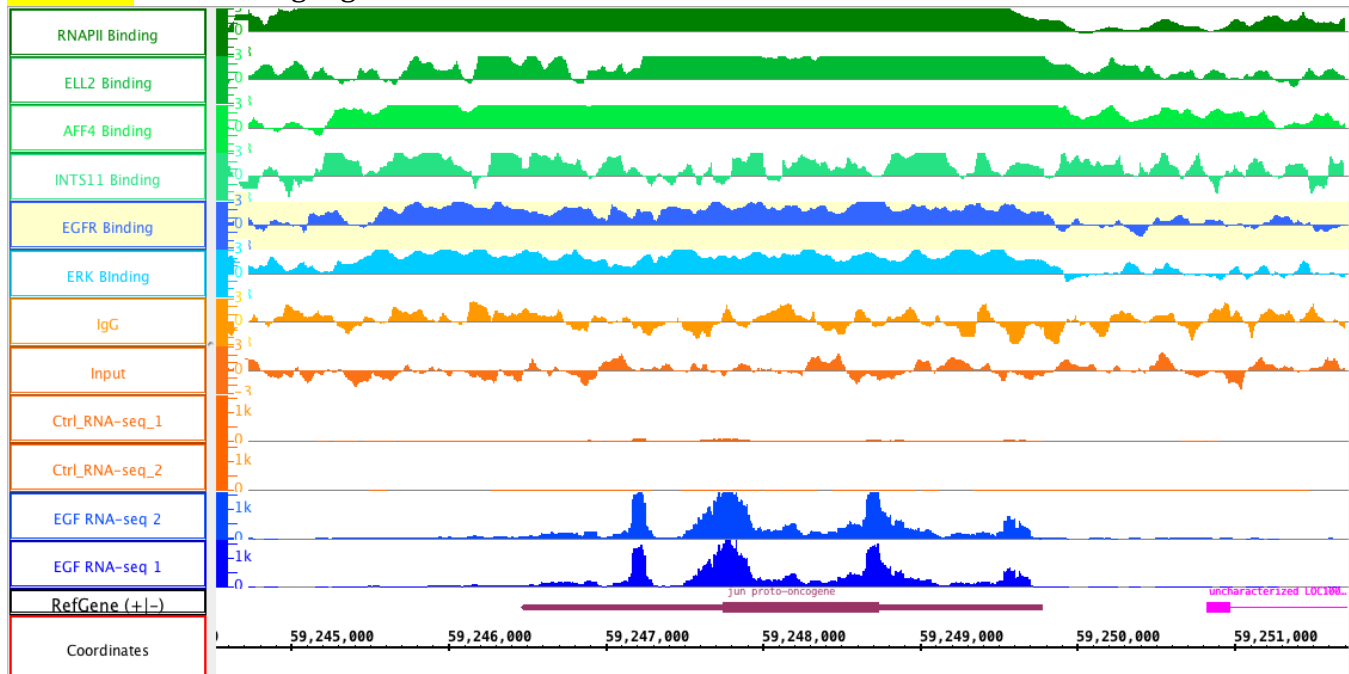

**[EGR1]** - nEGFR target gene

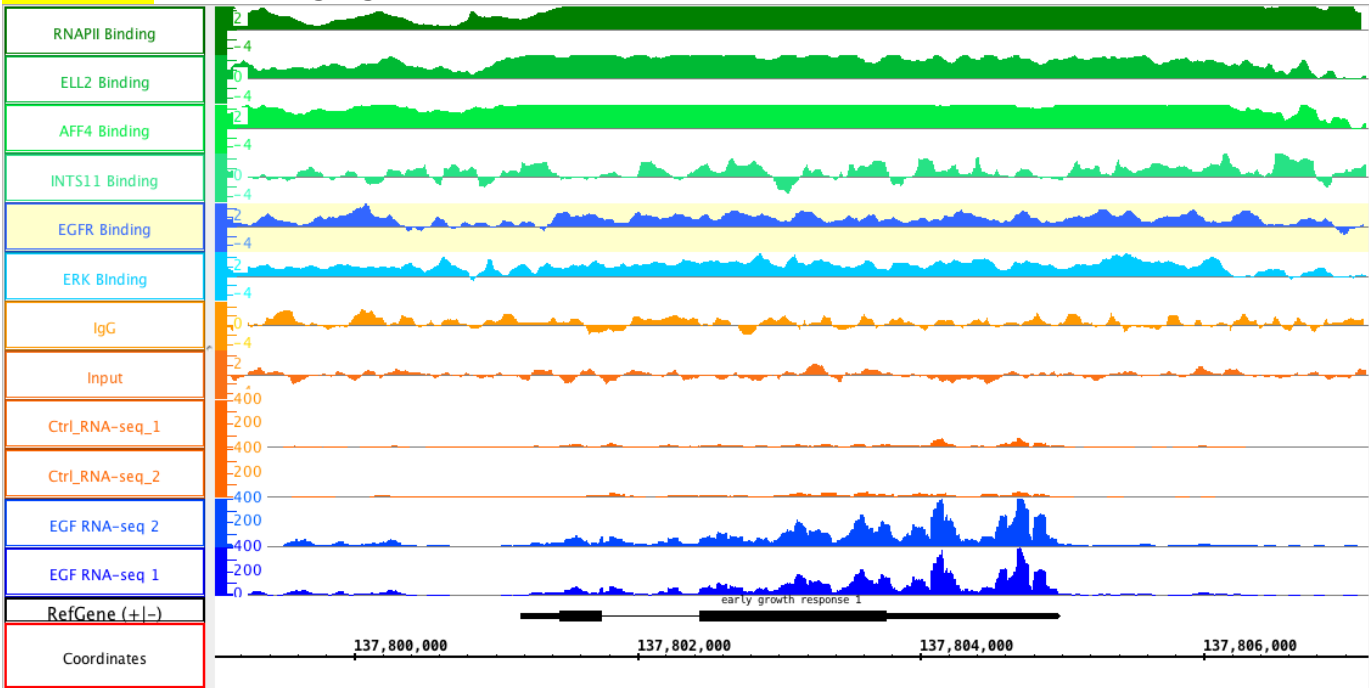

**[FOS]** - nEGFR target gene

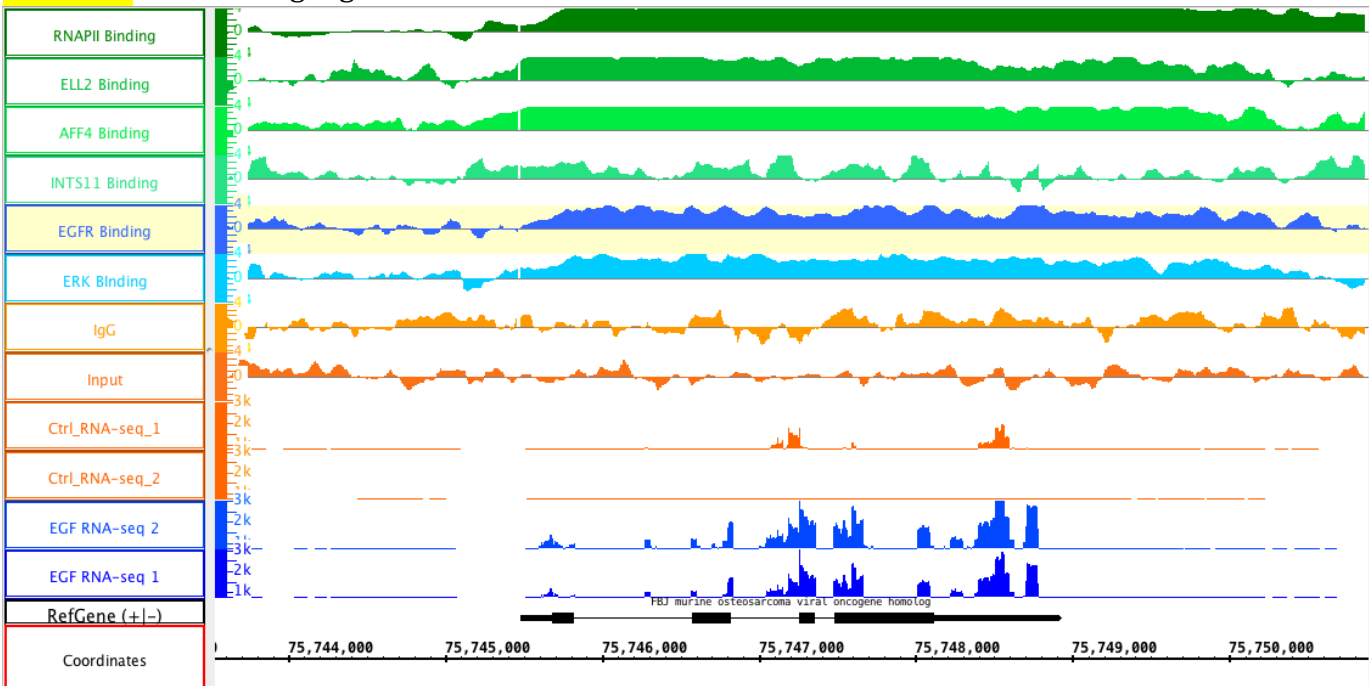

**[IER2]** - nEGFR target gene

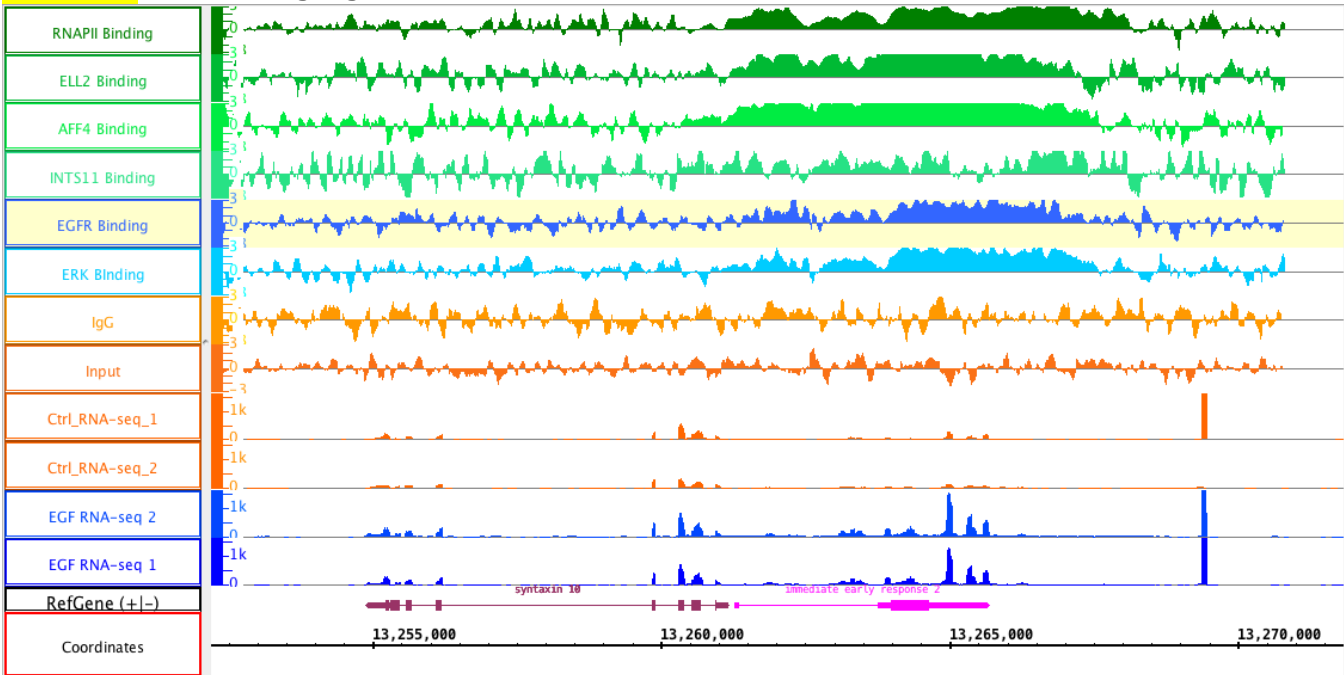

**[DUSP1]** - nEGFR target gene

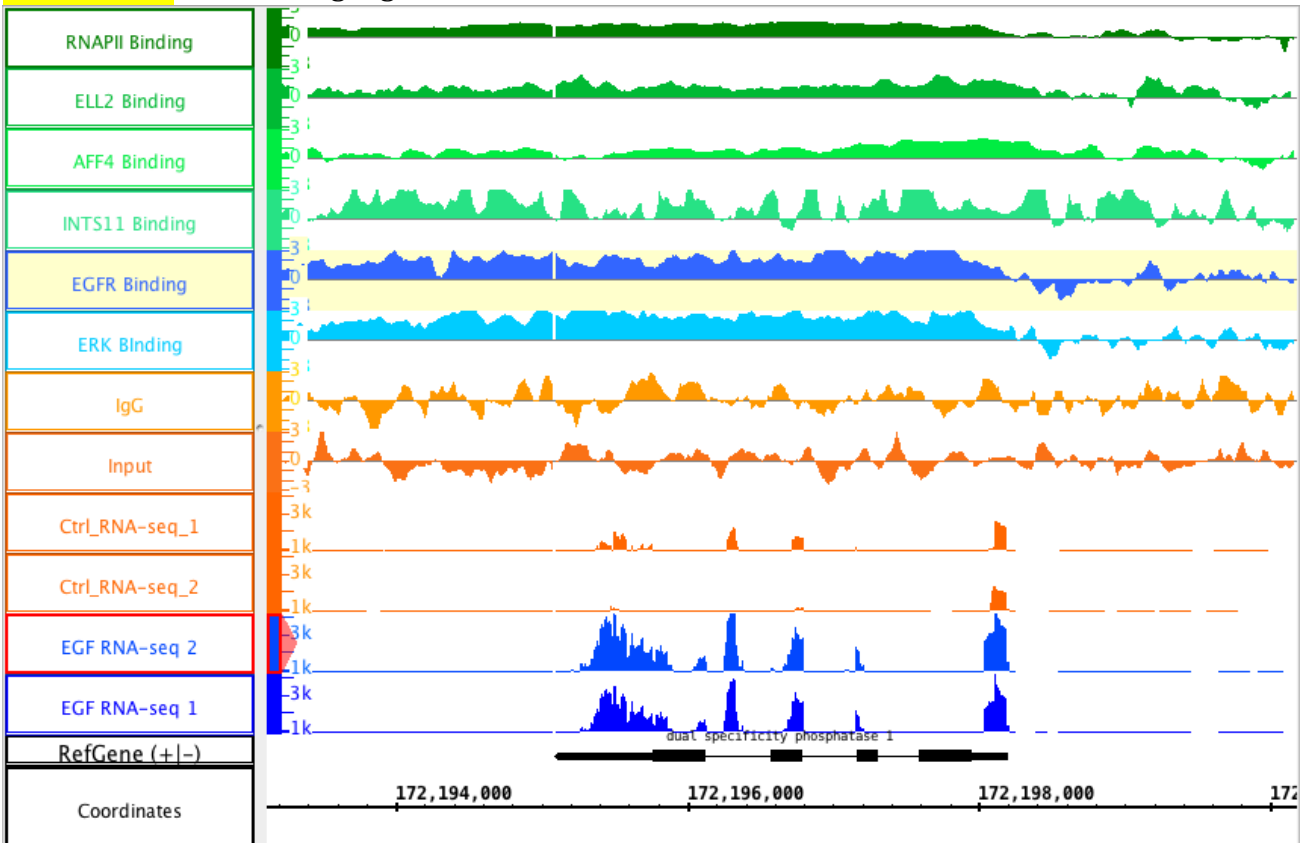

**[DUSP2]** - nEGFR target gene

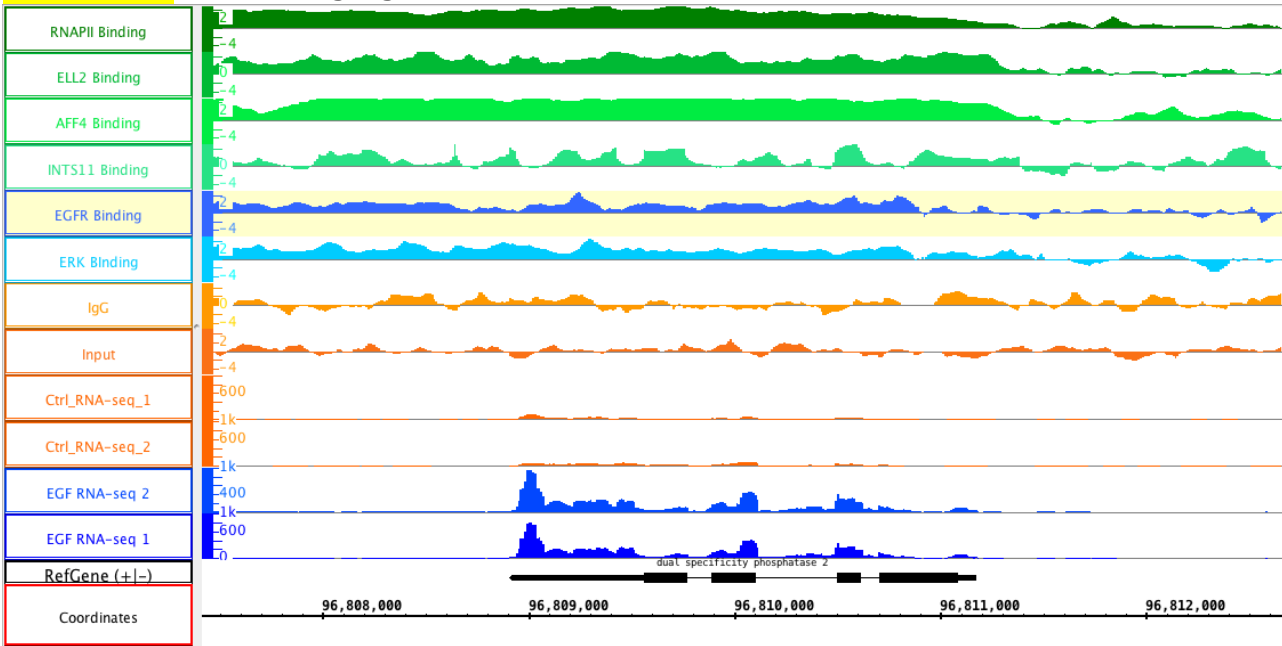

**[DUSP5]** - nEGFR target gene

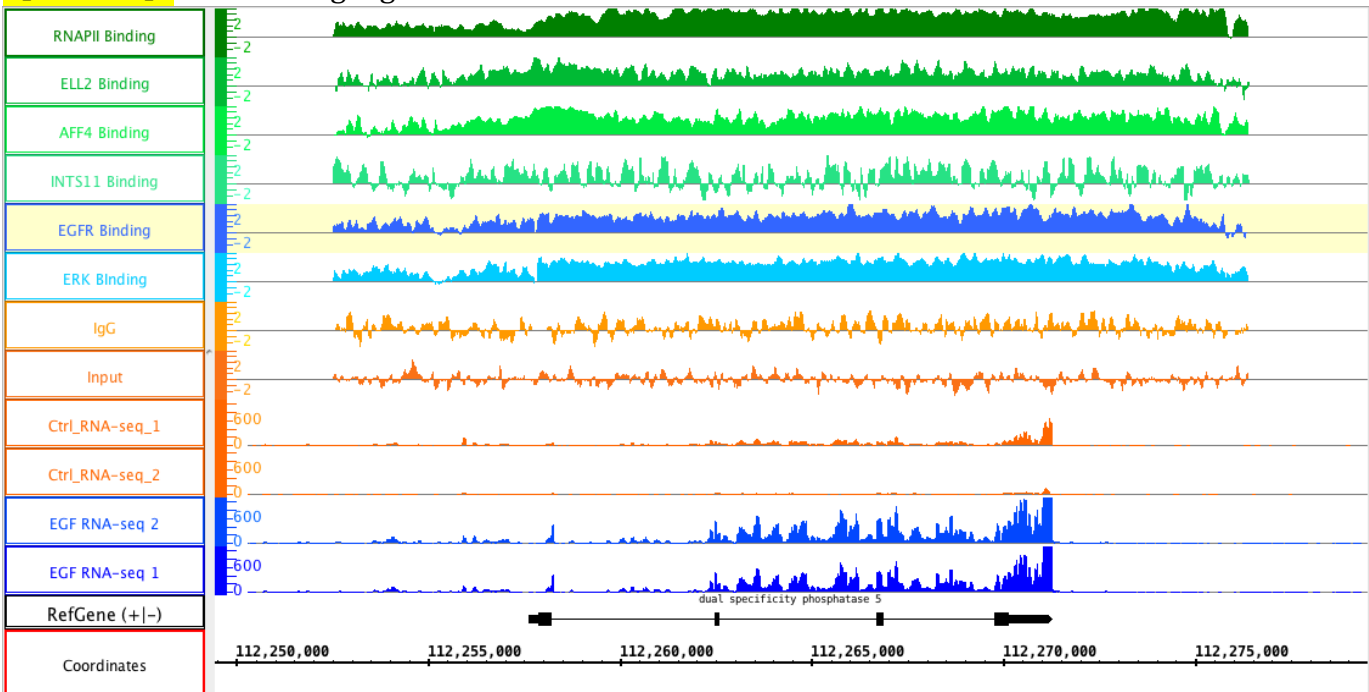

**【FOSL1】** - nEGFR target gene

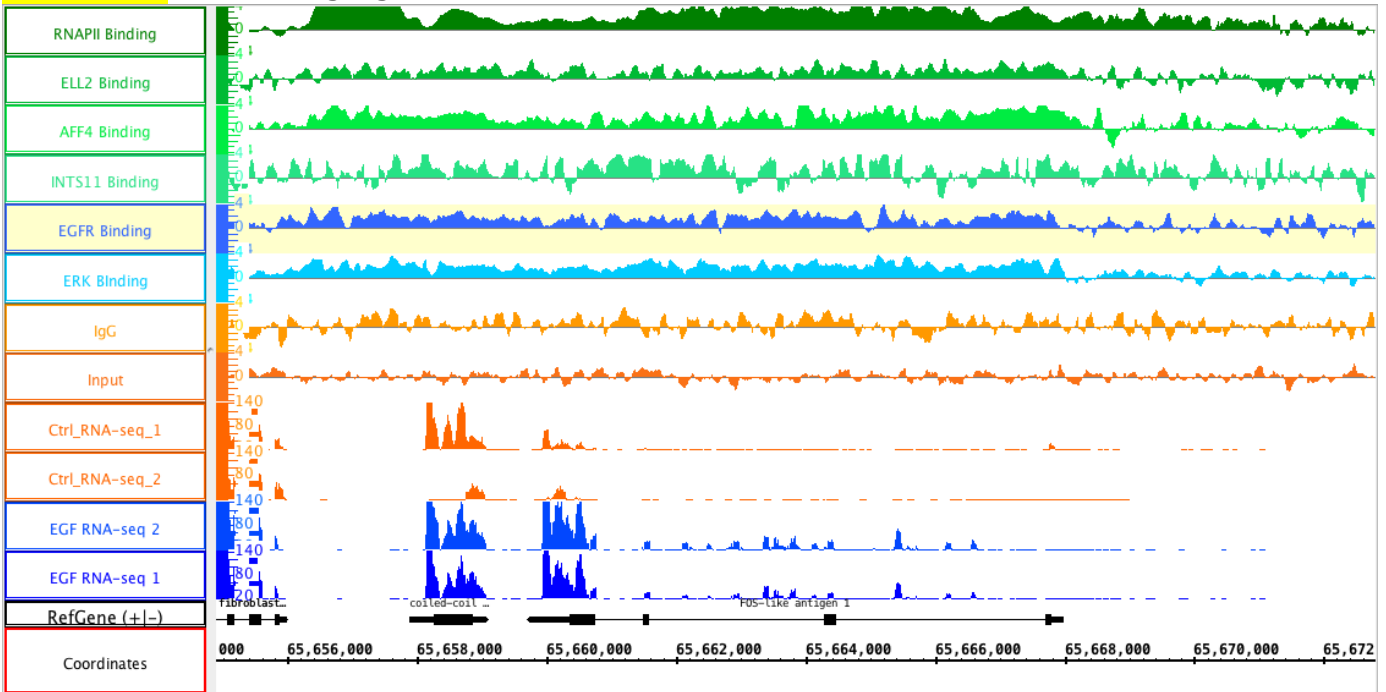

**【JUNB】** - nEGFR target gene

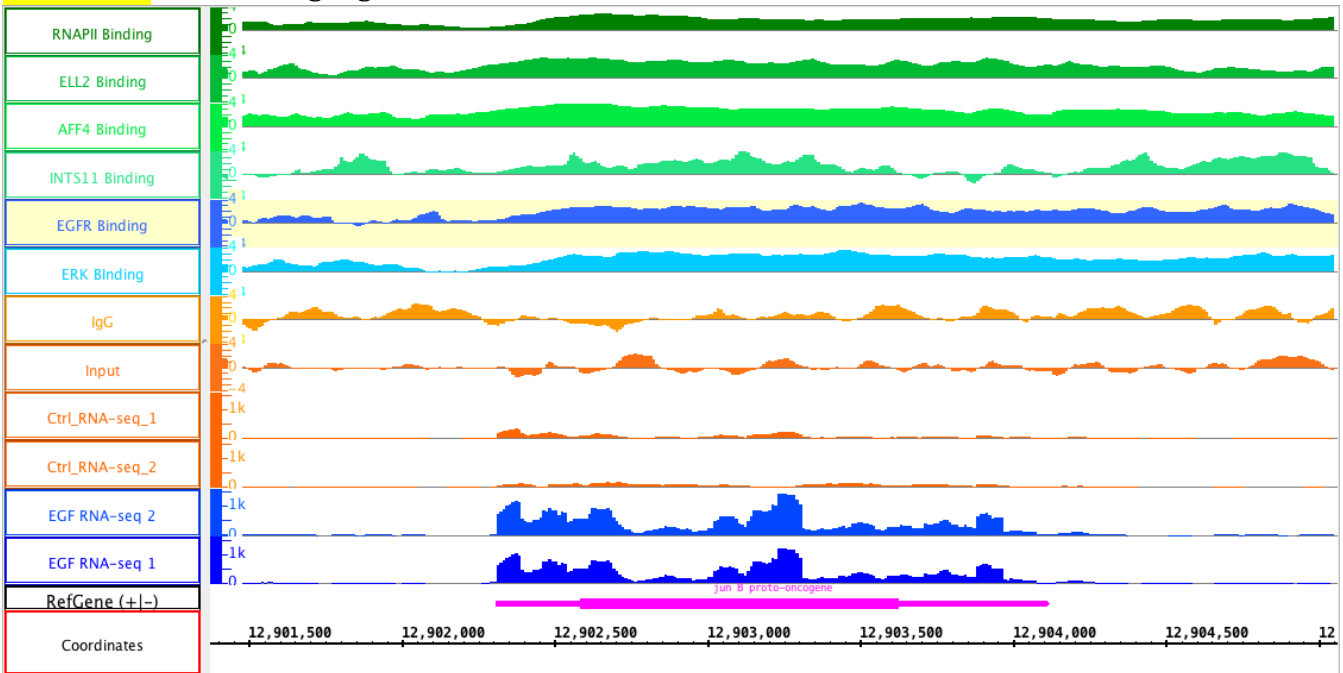

**[KLF2]** - nEGFR target gene

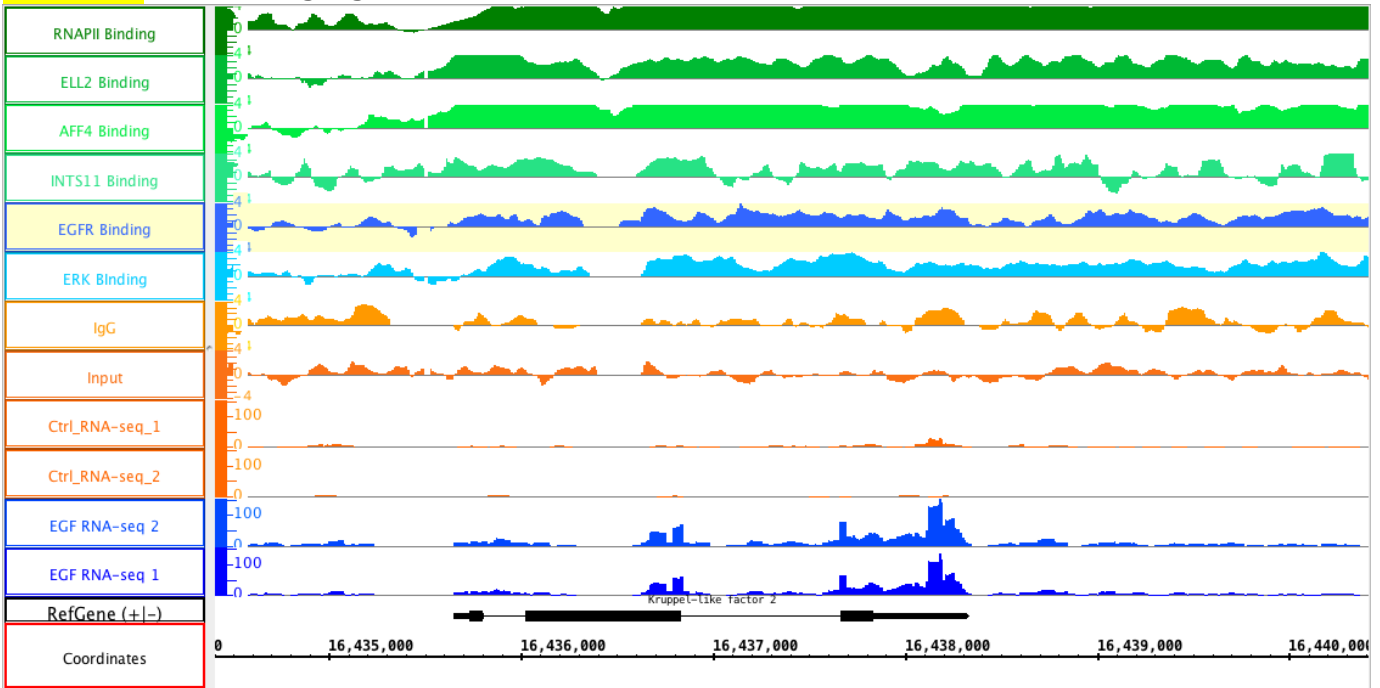

**[CCNL1]** - nEGFR target gene

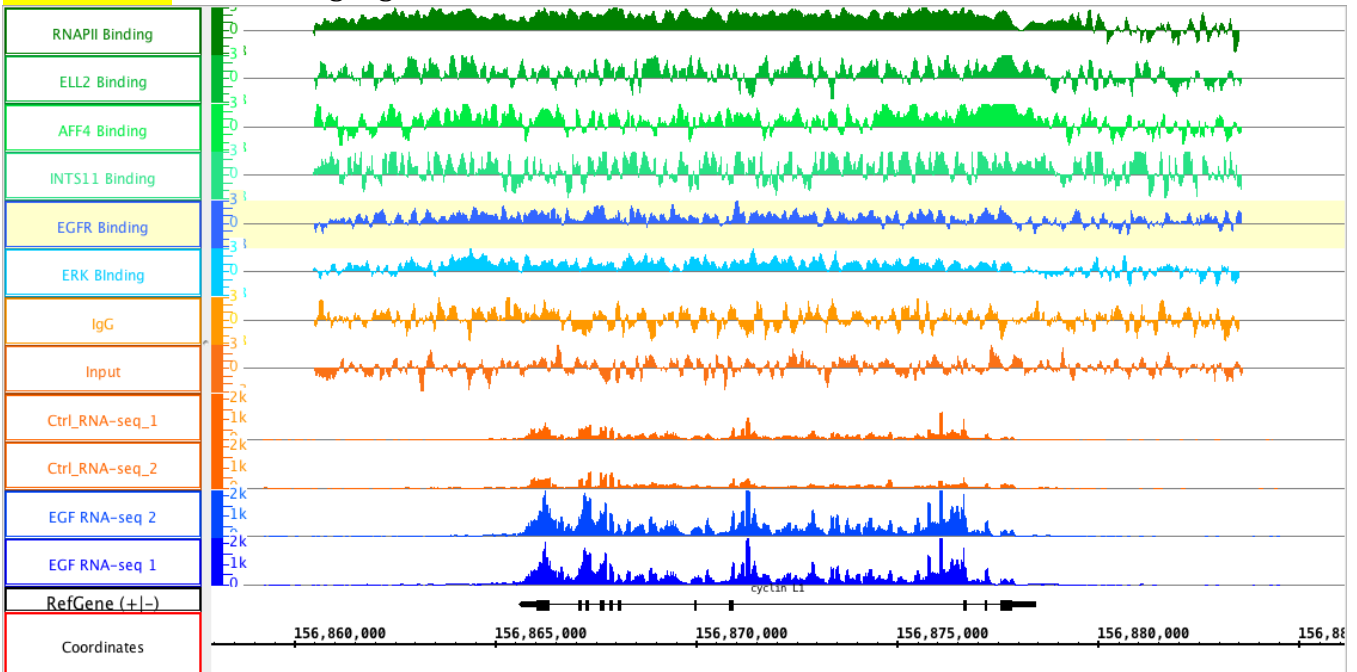

**[RHOB]** - nEGFR target gene

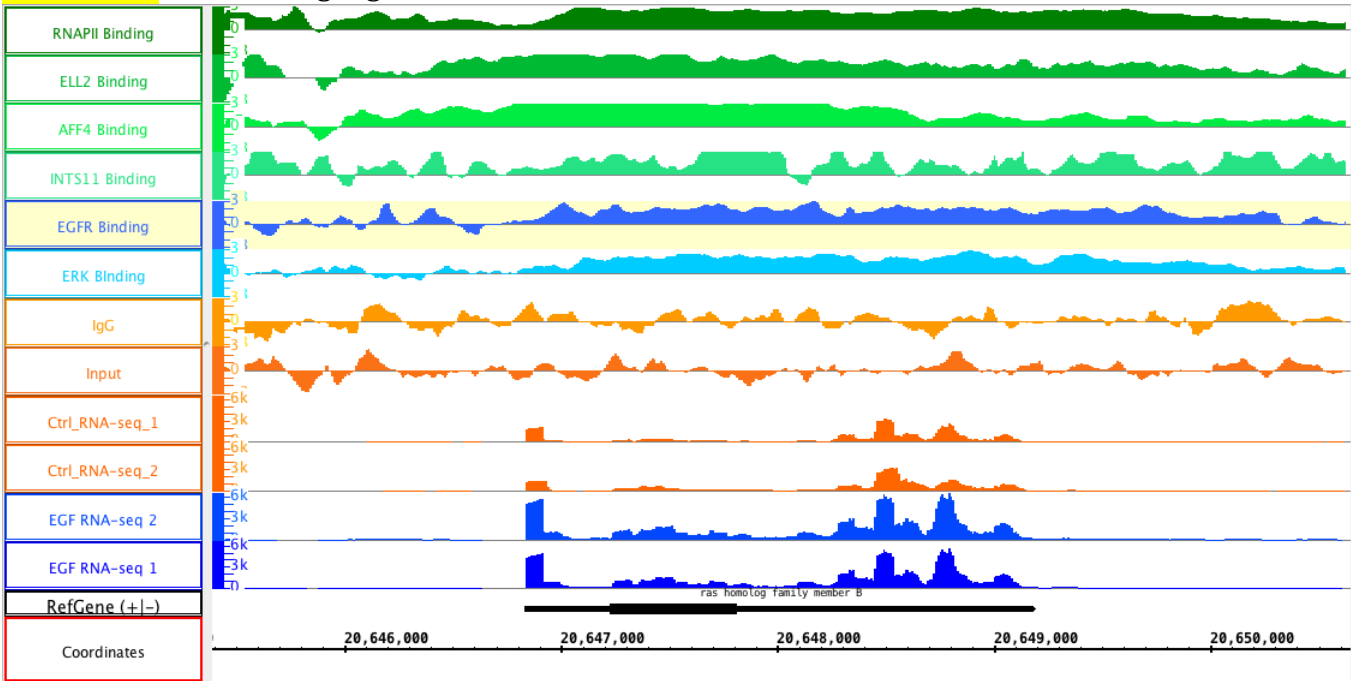

**[FOSB]** -with moderate nEGFR binding, as seen in genome browser

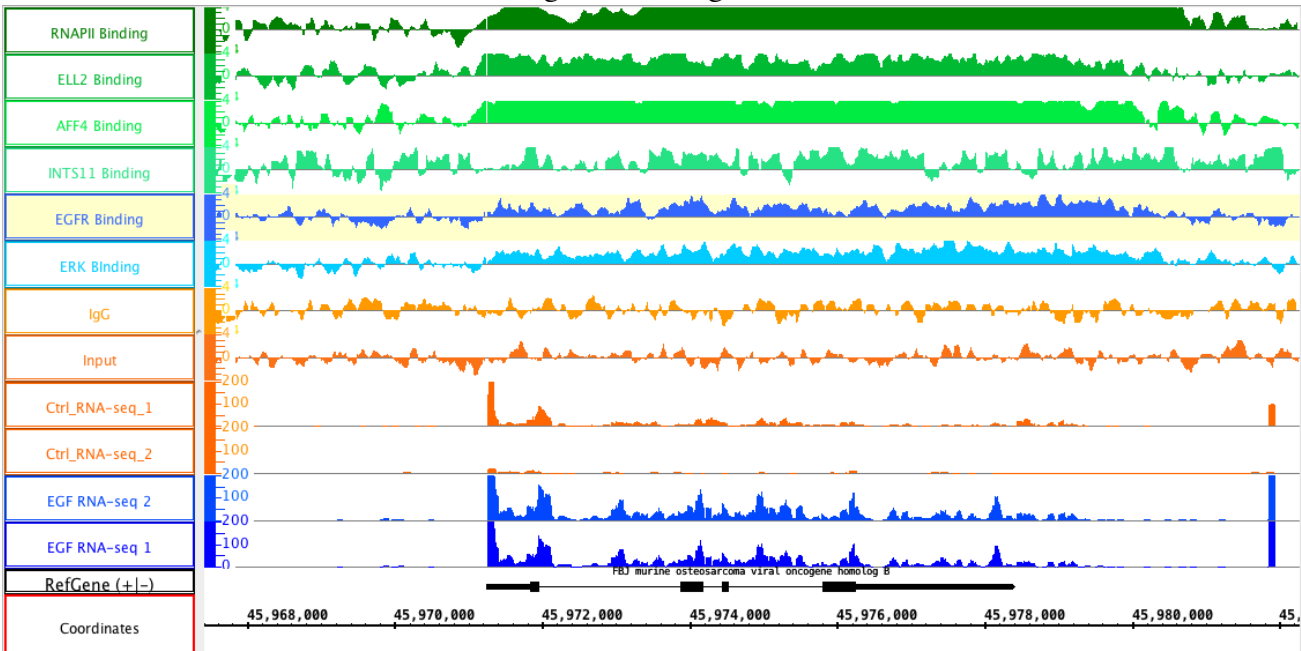



**[N4A1]** -with moderate nEGFR binding, as seen in genome browser

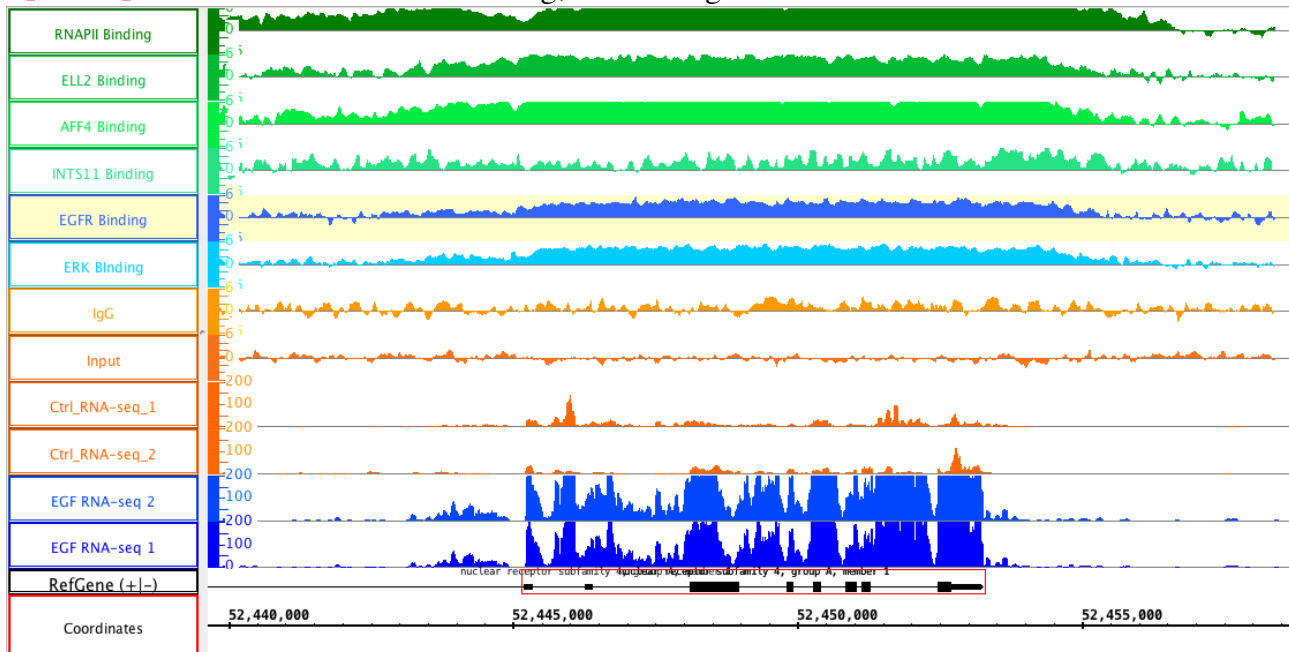

**[N4A3]** -with moderate nEGFR binding, as seen in genome browser

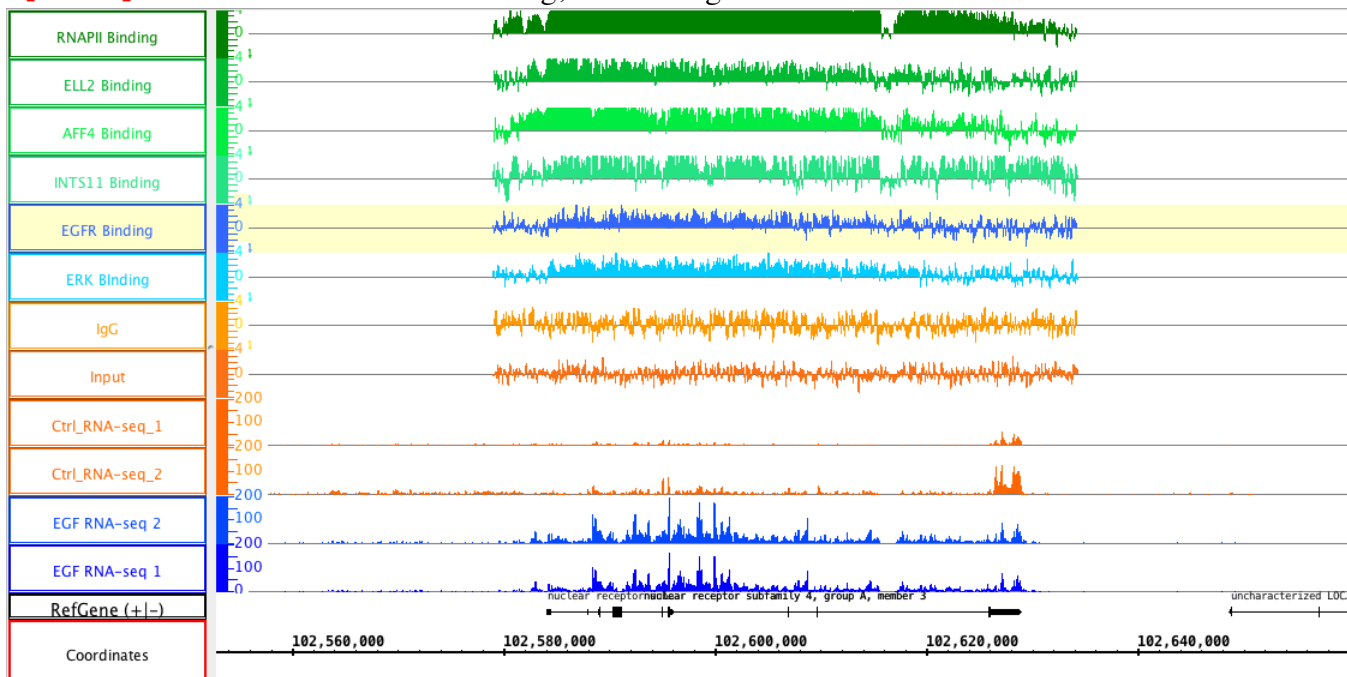

**[ZFP36]** -with moderate nEGFR binding, as seen in genome browser

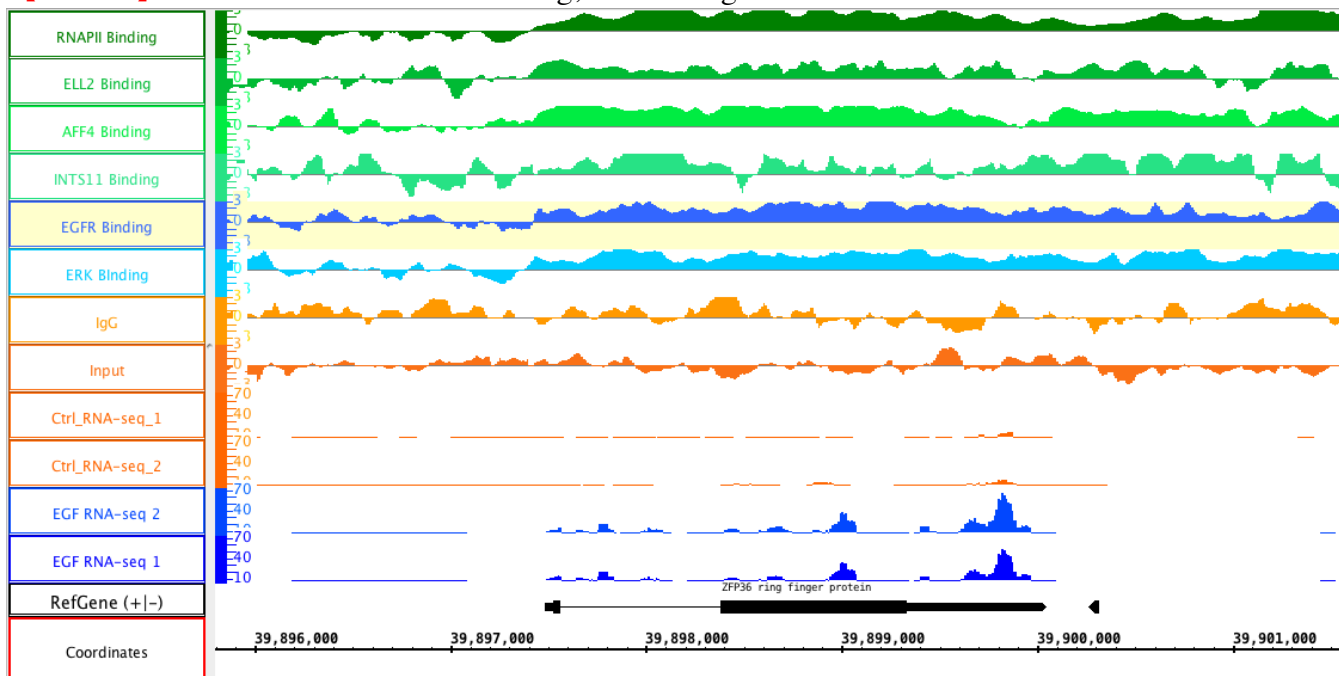

**[ZFP36L1]** - a negative control reference

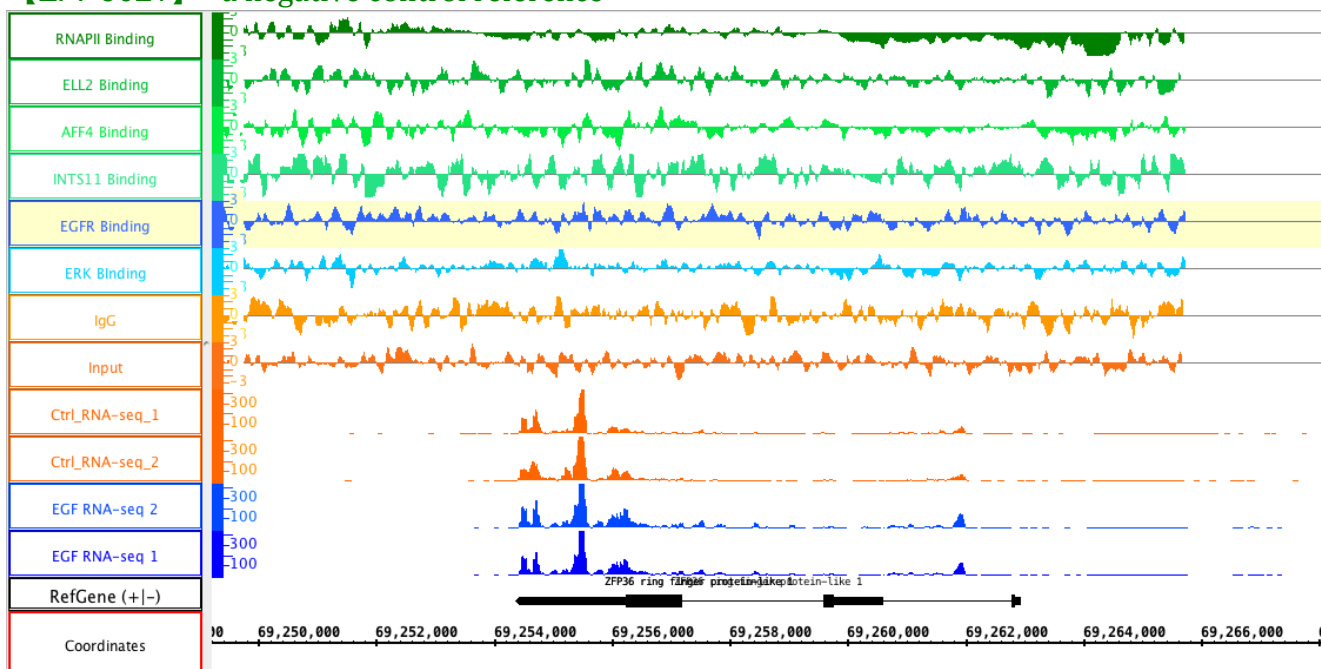

**[DUSP3]** - a negative control reference

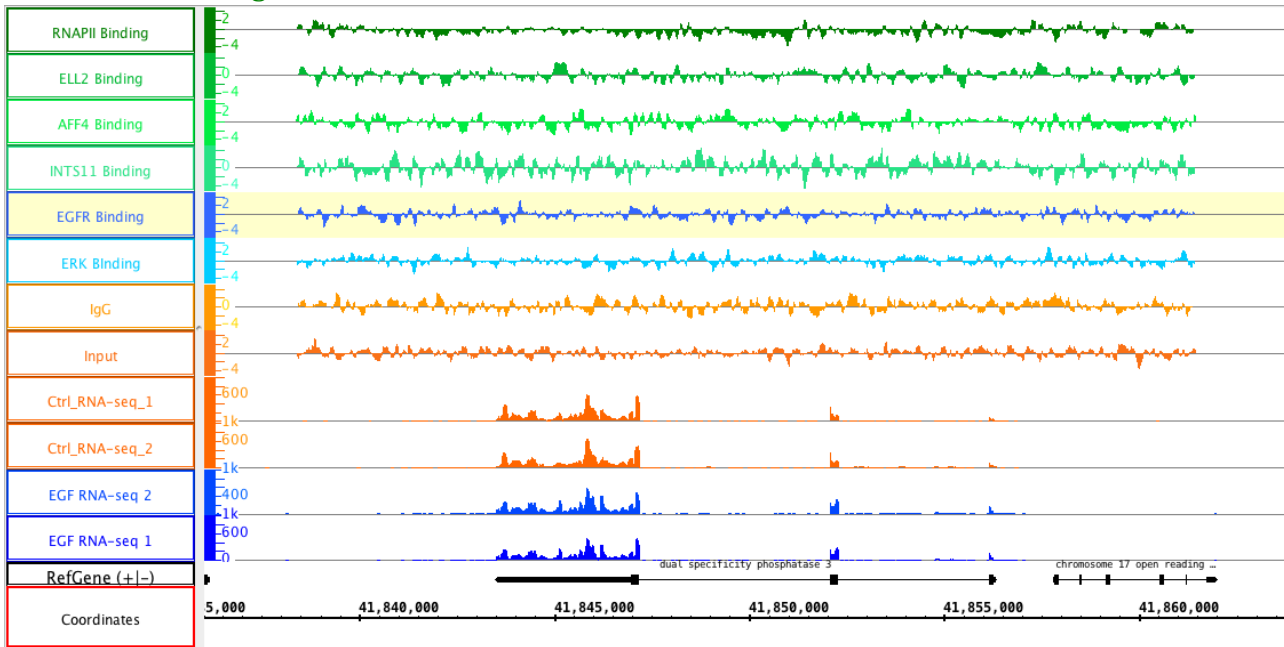

**[DUSP8]** - a negative control reference

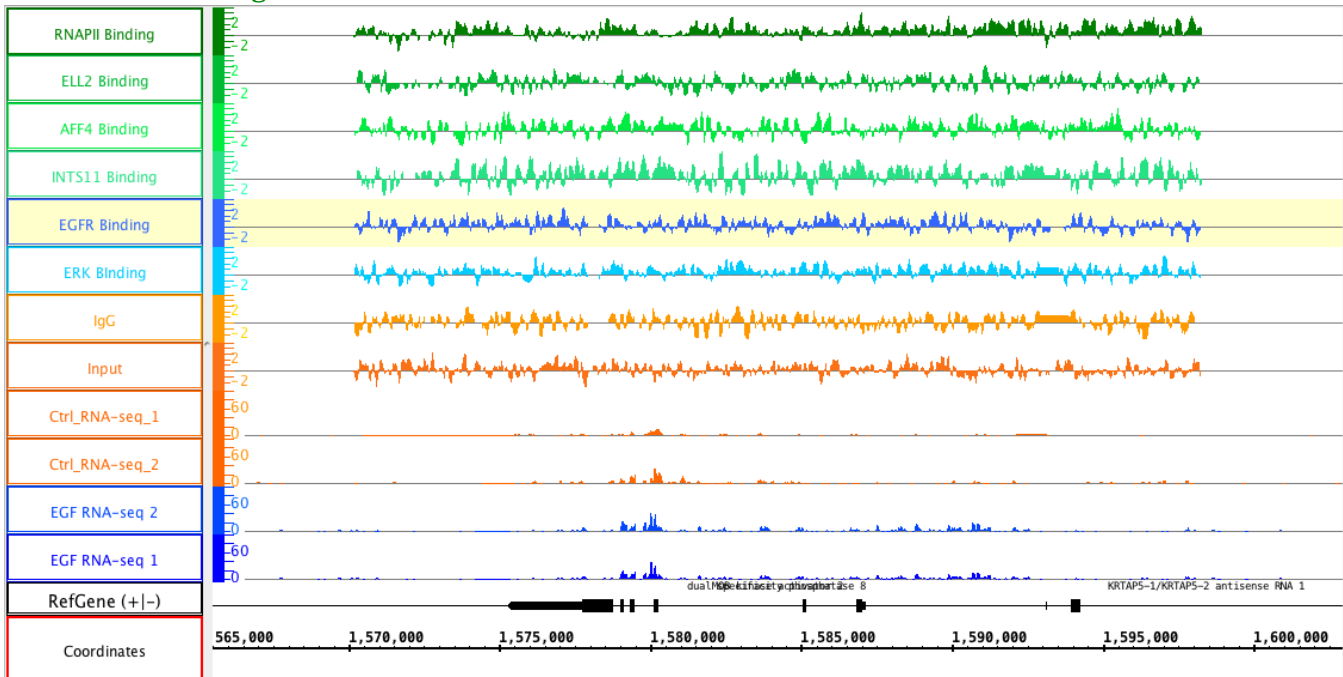

**Table S1:** ChIP-seq and RNA-seq data used in this study

| GEO dataset | Name                 | Description                        |
|-------------|----------------------|------------------------------------|
| SRR1773226  | pEGFR_control_repl_1 | ChIP-seq of EGFR before EGF        |
| SRR1773227  | pEGFR_control_repl_2 | ChIP-seq of EGFR before EGF        |
| SRR1773228  | pEGFR_EGF20_repl_1   | ChIP-seq of EGFR after EGF         |
| SRR1773229  | pEGFR_EGF20_repl_2   | ChIP-seq of EGFR after EGF         |
| SRR1773230  | pERK_control_repl_1  | ChIP-seq of ERK before EGF         |
| SRR1773231  | pERK_control_repl_2  | ChIP-seq of ERK before EGF         |
| SRR1773232  | pERK_EGF20_repl_1    | ChIP-seq of ERK after EGF          |
| SRR1773233  | pERK_EGF20_repl_2    | ChIP-seq of ERK after EGF          |
| SRR1342254  | RNAPII_0min_rep1     | ChIP-seq of RNAPII before EGF      |
| SRR1342256  | RNAPII_0min_rep2     | ChIP-seq of RNAPII before EGF      |
| SRR1342255  | RNAPII_20min_rep1    | ChIP-seq of RNAPII before EGF      |
| SRR1342257  | RNAPII_20min_rep2    | ChIP-seq of RNAPII before EGF      |
| SRR1342222  | AFF4_CTRL_rep1       | ChIP-seq of AFF4 before EGF        |
| SRR1342226  | AFF4_CTRL_rep2       | ChIP-seq of AFF4 before EGF        |
| SRR1342223  | AFF4_CTRL_EGF_rep1   | ChIP-seq of AFF4 after EGF         |
| SRR1342227  | AFF4_CTRL_EGF_rep2   | ChIP-seq of AFF4 after EGF         |
| SRR1342230  | ELL2_CTRL_rep1       | ChIP-seq of ELL2 before EGF        |
| SRR1342234  | ELL2_CTRL_rep2       | ChIP-seq of ELL2 before EGF        |
| SRR1342231  | ELL2_CTRL_EGF_rep1   | ChIP-seq of ELL2 after EGF         |
| SRR1342235  | ELL2_CTRL_EGF_rep2   | ChIP-seq of ELL2 after EGF         |
| SRR1342246  | INTS11_0min_rep1     | ChIP-seq of INTS11 before EGF      |
| SRR1342248  | INTS11_0min_rep2     | ChIP-seq of INTS11 before EGF      |
| SRR1342247  | INTS11_20min_rep1    | ChIP-seq of INTS11 after EGF       |
| SRR1342249  | INTS11_20min_rep2    | ChIP-seq of INTS11 after EGF       |
| SRR4015769  | CTRL (Input)         | ChIP-seq input control before EGF  |
| SRR4015770  | EGF20 (Input)        | ChIP-seq input control after EGF   |
| SRR1773234  | IgG_control          | ChIP-seq of IgG control before EGF |
| SRR1773235  | IgG_EGF20            | ChIP-seq of IgG control after EGF  |
| SRR1342238  | CTRL_RNA_rep1        | RNA-seq before EGF                 |
| SRR1342242  | CTRL_RNA_rep2        | RNA-seq before EGF                 |
| SRR1342239  | CTRL_EGF_RNA_rep1    | RNA-seq after EGF                  |
| SRR1342243  | CTRL_EGF_RNA_rep2    | RNA-seq after EGF                  |

**Table S2:**

TCGA data used in Kaplan-Meier Analysis and Cox proportional hazards analyses

| TCGA provisional data set                                           | Patient Number<br>with available<br>OS* data |
|---------------------------------------------------------------------|----------------------------------------------|
| Bladder Urothelial Carcinoma                                        | 405                                          |
| Brain Lower Grade Glioma                                            | 516                                          |
| Breast Invasive Carcinoma                                           | 1090                                         |
| Cervical Squamous Cell Carcinoma and<br>Endocervical Adenocarcinoma | 302                                          |
| Colorectal Adenocarcinoma                                           | 371                                          |
| Esophageal Carcinoma                                                | 184                                          |
| Head and Neck Squamous Cell Carcinoma                               | 518                                          |
| Kidney Renal Clear Cell Carcinoma                                   | 530                                          |
| Lung Adenocarcinoma                                                 | 504                                          |
| Lung Squamous Cell Carcinoma                                        | 493                                          |
| Ovarian Serous Cystadenocarcinoma                                   | 250                                          |
| Pancreatic Adenocarcinoma                                           | 178                                          |
| Prostate Adenocarcinoma                                             | 496                                          |
| Sarcoma                                                             | 258                                          |
| Stomach Adenocarcinoma                                              | 404                                          |
| Thyroid Carcinoma                                                   | 500                                          |
| Uterine Corpus Endometrial Carcinoma                                | 175                                          |

---

\* OS = Overall Survival

**Table S3:**

The genes in the cluster 1 identified by K-means unsupervised clustering analysis

| Gene Symbol | Gene Symbol |
|-------------|-------------|
| BTG2        | ACTB        |
| FOS         | ACTG1       |
| JUN         | ARC         |
| ZC3H12A     | C19orf71    |
| ATF3        | CCDC64B     |
| CCNL1       | CCDC85B     |
| DUSP2       | CFL1        |
| DUSP5       | COL7A1      |
| EGR1        | CSRNP1      |
| EGR3        | CSRP1       |
| IER2        | DNAJB1      |
| JUNB        | EGR2        |
| KLF2        | EPPK1       |
| KLF6        | ETF1        |
| NR4A1       | EZR         |
| ZFP36       | FASN        |
| CTGF        | FLNA        |
| CYR61       | FZR1        |
| FOSB        | HMG20B      |
| LDLR        | HSPA8       |
| NR4A2       | IDI1        |
| NR4A3       | MFSD12      |
| RHOB        | MT1E        |
| FOSL1       | SNORA31     |
| JUND        | SOWAHC      |
| MAFF        | THOC6       |
| MCL1        | WDR1        |
| THBS1       |             |
| TM4SF1      |             |
| TPM4        |             |
| KRT17       |             |
| MT1X        |             |
| MT2A        |             |
| ZYX         |             |

---

**Table S4:** Gene ontology (GO) analysis of EGF-responsive gene cluster 1.

| GO | Biological Process                                                                                                                                                                   | Adjusted P-value | Z-score | Combined Score |
|----|--------------------------------------------------------------------------------------------------------------------------------------------------------------------------------------|------------------|---------|----------------|
| 1  | Positive regulation of transcription initiation from RNA polymerase II promoter                                                                                                      | 1.38793E-08      | -6.55   | 158.09         |
| 2  | Positive regulation of transcription from RNA polymerase II promoter involved in neuron differentiation                                                                              | 1.38793E-08      | -6.74   | 156.57         |
| 3  | Positive regulation of purine nucleotide biosynthetic process by positive regulation of transcription from RNA polymerase II promoter                                                | 1.38793E-08      | -6.49   | 142.43         |
| 4  | Positive regulation of ribosomal protein gene transcription from RNA polymerase II promoter                                                                                          | 1.38793E-08      | -6.48   | 142.22         |
| 5  | Positive regulation of peroxisome organization by positive regulation of transcription from RNA polymerase II promoter                                                               | 1.38793E-08      | -6.48   | 142.12         |
| 6  | Regulation of glycolytic process by positive regulation of transcription from RNA polymerase II promoter                                                                             | 1.38793E-08      | -6.48   | 142.12         |
| 7  | Regulation of cellular ketone metabolic process by positive regulation of transcription from RNA polymerase II promoter                                                              | 1.38793E-08      | -6.48   | 142.10         |
| 8  | Positive regulation of termination of RNA polymerase II transcription                                                                                                                | 1.38793E-08      | -6.47   | 141.90         |
| 9  | Positive regulation of filamentous growth of a population of unicellular organisms in response to starvation by positive regulation of transcription from RNA polymerase II promoter | 1.38793E-08      | -6.47   | 141.88         |
| 10 | Positive regulation of SREBP signaling pathway                                                                                                                                       | 1.38793E-08      | -6.50   | 141.83         |

**Table S5:** Activating/ repressive function prediction

| ChIP Target | <i>p</i> value for activating function | <i>p</i> value for repressive function |
|-------------|----------------------------------------|----------------------------------------|
| EGFR        | 5.55E-05                               | 0.981                                  |
| ELL2        | 3.09E-11                               | 0.422                                  |
| INTS11      | 1.05E-09                               | 0.052                                  |
| RNAPII      | 1.30E-05                               | 0.00573                                |
| ERK         | 1.30E-05                               | 0.768                                  |
| AFF4        | 5.55E-05                               | 0.0275                                 |
| IgG-1       | 0.449                                  | 0.535                                  |
| IgG-2       | 0.638                                  | 0.768                                  |



**Table S6:**

Up-regulated genes targeted by chromatin-bound nEGFR.

Yellow highlighted genes are genes presented in EGF-responsive gene cluster 1

| Chroms | RefseqID     | Rank product | Strands | GeneSymbol |
|--------|--------------|--------------|---------|------------|
| chr2   | NM_004418    | 1.48E-07     | -       | DUSP2      |
| chr19  | NM_016270    | 1.60E-07     | +       | KLF2       |
| chr5   | NM_001964    | 2.50E-07     | +       | EGR1       |
| chr2   | NM_004040    | 2.57E-07     | +       | RHOB       |
| chr10  | NM_004419    | 2.69E-07     | +       | DUSP5      |
| chr5   | NM_004417    | 2.82E-07     | -       | DUSP1      |
| chr1   | NM_002228    | 4.62E-07     | -       | JUN        |
| chr14  | NM_005252    | 4.75E-07     | +       | FOS        |
| chr19  | NM_004907    | 5.07E-07     | +       | IER2       |
| chr19  | NM_002229    | 6.86E-07     | +       | JUNB       |
| chr11  | NM_001300855 | 7.70E-07     | -       | FOSL1      |
| chr3   | NM_020307    | 1.57E-05     | -       | CCNL1      |

**Table S7:**

ATRS sites (in red; either TNTTT or TTTNT; N is any nucleotide) on the promoters (1500 upstream from TSS) of nEGFR target genes. Green indicates the flanking sequences around ATRS sites in various lengths.

|                                                                                                                                                                                                                                                                                                                                                                                                                                                                                                                                                                                                                                                                                                         |
|---------------------------------------------------------------------------------------------------------------------------------------------------------------------------------------------------------------------------------------------------------------------------------------------------------------------------------------------------------------------------------------------------------------------------------------------------------------------------------------------------------------------------------------------------------------------------------------------------------------------------------------------------------------------------------------------------------|
| <p><b>JUNB (10 ATRS sites)</b></p> <p>GACAGGGCCGGGCTCCTTCCCCGGGGCTGTTGCCACACTTCTGCCTCTGCGCTCTTTCC<br/>CCCAGCC<b>TGTTT</b>CTAAGGAAGGGAGTGGGGTTGGCGACC GCCGCCAGCCGTGGGGCTC<br/>TCTCCTTACCCGGGCTAGCAGATGACCCCAAGTGGTCCCCAA<b>TTTCT</b>GGCAGACATGTCT<br/>CCATCTTCTACCTGGCA<b>TATTT</b>ACCTGCCTCAGTGTACCCAGGCCGCTTACTAGCTTT<br/>GACTCAGCTCCCATGAGCTCCTGGACCCCTACTCA<b>TTTCT</b>TGCAATTTAATGGGTCATGC<br/>TCCCATTACAGTGTCTAACCCCA<b>TTTCT</b>GCTTTTGGGGTCTCCCAATGGATTGTCA<br/>GTCCCTCCTACCCCTCTCGTATTCTGGGTACCTCAGGGG<b>TTTCT</b>TGACACATACTGGGACC<br/>CTCACCCCACTGCTGCGTACCAGGTCTGG<b>TATTT</b>GTCCCACTGGACTCCAGGAAATC<br/>CCG<b>CTGTTT</b>ACAAGGACACGGCTTCTGACAGTGACGCGAGCCGCTCCTCCCTTCC</p>                 |
| <p><b>RHOB (7 ATRS sites)</b></p> <p>TCCTGCTTGTGTTCAAGG<b>TGTTT</b>CTCCTGCCCGGGAGCCCTCCCGACTCCCTTTCCCC<br/>CTATCCCTTCTTCC<b>TCTTT</b>TATCCGTAGAAATCGGTTGACTTGGG<b>TCTTT</b>CCGGATCAC<br/>CATTCTATTGTACAATAGTGTATATTCTATTGTACA<b>TTTAT</b>CTCAGACAGTCTCTGT<br/>AAAAGAAAAGAGAAAACACT<b>CTGTTT</b>GGGAACAAAAGTGTGTGTGGGGTGTGTGTGT<br/>GTGTGTGTGTGTGTGTGT<b>TGTTT</b>ATTTAAAAACAAAACCAAGTAAAAGAGCTGCC<br/>CGGCTATATTAAGAAAGTGGCCGACT<b>TCTTT</b>AAATAGCGGGCGCTAGGGCCGACGCCCT</p>                                                                                                                                                                                                                            |
| <p><b>CNL1 (12 ATRS sites)</b></p> <p>ACAAAAATGGAAGAAAACAGAAAACGGTGTCAATTT<b>TGTTT</b>AAGGAAACCGAGGC<br/>TCCTTTAAAAG<b>TTTGT</b>TATAAAATATAGATATCTATAAAATTTAGAGTGGAAAGATT<br/><b>TTTAT</b>CTTTTTTTCATAGGGGAAAGGGTAGATGAGAAATGTAGACAT<b>TTATTT</b>TGAG<br/>GAGCAGCAAAATGATTATTAGGAACAATGAATGGACAGAAATAGTAAATA<b>TTTCTTT</b><br/>GAGTAATCTTGTGAAAAAGTCCCTCCAGGAATGGCTGCA<b>TTTCT</b>GAG<b>TCTTTT</b>TGAAATA<br/>GTCAAGTGTGGGGACCTGCATTATGAGGCAGCTTCTAAAGCCTCT<b>TCTTT</b>GGGGTATC<br/>GC<b>TTTCT</b>GAGCGTCAAGAGTAAAACGTGATGCATTCCTTCTTCCCAACCTAGATTCTAG<br/>TAGTTTAGATCAGTATCAT<b>TGTTT</b>TACTTCAAGGTTCAAGAAACGCTGGAAATGTCTAG<br/>CTAAGAC<b>TATTT</b>TTGGAAACTAGGGATTTTCCAGATTACTGAAAGCCGTGGCGGTGCA</p> |
| <p><b>EGR1 (4 ATRS sites)</b></p> <p>CCCC<b>TCTTT</b>CGGATTCGCCAGTGTGGGCCGGCCCTCCACCTGGACTGGATAAAGGGGGG<br/>TTGGGGCAATCAGCTTCCCACTTCGGTCCCCAAAGGTGGGG<b>TCTTT</b>CCGGCCGGGGAC<br/>GAGCAGGAAGGATCCCCCGCCGGAACAACCC<b>TATTT</b>GGGCAGCACCT<b>TATTT</b>GGAGTGG</p>                                                                                                                                                                                                                                                                                                                                                                                                                                         |
| <p><b>KLF2 (8 ATRS sites)</b></p> <p>TGACTGTATCACCGTCTCTGAGTTACTTAATTCAT<b>TTTAT</b>GGAAAGTCAAGTAAAGGAAC<br/>TTAATGTGTCTTGTGTTTACCACACAAAAGT<b>TTTGT</b>TT<b>TGTTT</b>TTTGGAGACAGT<br/>TCCTGGGCTCAAGCGATCCTCCACCTCAGCCTCCCACTACACCCAGCTAA<b>TTTTTTT</b>A<br/><b>TTTTT</b>TAAGAGATGGGGCCACTGTGTTGCCAGGCTGGTCTTGAACCTCGCCCTCGAG<br/>GCTTACACAAGG<b>TGTTTTTTTT</b>ACAGGGTGTGTGCACACGGTGGGTCCCTCTGGGTGG</p>                                                                                                                                                                                                                                                                                                 |
| <p><b>FOS (5 ATRS sites)</b></p> <p>ACACCCCTTCAAATGTCTTCCACAGTGGTTTGCACAG<b>TGTTT</b>ATCTGCTGGTGTCTC<br/>CGCGTGTCT<b>TCTTT</b>AAAAAAATAAATAAATAAGTACCCAGTATCGTAAAGTAGGTTATC<br/>GTATTCTCT<b>TATTT</b>TGGATCCTCCACT<b>TTTCT</b>GCTTCCAAACCGCAGGAACAGTGTAGTAT<br/>TCCTCGGGTCTGTACTCGATGCCG<b>TTTCT</b>CCTATCTGTGAGCCTCAGAACTGTCTTCA</p>                                                                                                                                                                                                                                                                                                                                                                   |
| <p><b>DUSP2 (4 ATRS sites)</b></p> <p>TTCAAGACGGTCTGGACACAGGGGTCTGTGGGGGAGCCGGAAGGG<b>TCTTT</b>CAGAGGGCAC<br/>TCACCCGTGGCAGCAGGCA<b>TTTGT</b>CA<b>TGTTT</b>GTGGTGACAAA<b>TTTCT</b>AAGAGGAAAAAT</p>                                                                                                                                                                                                                                                                                                                                                                                                                                                                                                      |
| <p><b>IER2 (1 ATRS sites)</b></p> <p>ATCCGCTCCAGGAACACC<b>TTTCT</b>CTCCTGCAGGTCCCGGCTGGGAGCTTGAACCTGCCT</p>                                                                                                                                                                                                                                                                                                                                                                                                                                                                                                                                                                                             |
| <p><b>DUSP5 (5 ATRS sites)</b></p> <p>GCGGGCAGACT<b>TGTTT</b>CCATCAAGCAGTCCCAGCCAGGCTAACAAATAAATGGTTGGCAG<br/>TGAGCTTGGGGCAGAAAC<b>TGTTT</b>CCATCCATGTGTCCCGCAGCTAGCAAAAGCCCTGG<br/>CACCGCCGACCCCAACCCCG<b>TTTTT</b>ACTTTTACAAAC<b>TTTAT</b>TATGAAAAATATCAA<br/>GCCCGCCCTGCAGGGCTGGCCAGGGCCGAGGGGGGGGAAACCCCA<b>TATTT</b>GGC</p>                                                                                                                                                                                                                                                                                                                                                                        |
| <p><b>FOSL1 (12 ATRS sites)</b></p> <p>CTCTTGATC<b>TATTT</b>ACTTTGAGTCTTGTCTGTCCCCAGGCTGGACTGCAGTGGCGCAG<br/>GAACAGCTGGGACCAAGGCAGGCTACCACCATGTCCAGAAAA<b>TTTATAA</b><b>TTTTTT</b>TG<br/>TAGAGATGGGGTCTCAAATGGT<b>TCTTT</b>CTGCCCTTGGCCTTCCAAGTGCTAGGATTACAA<br/>GCATGAGCCACACCTGGCCCCAGCC<b>TCTTT</b>CTGTAGTCTGTGACAACCTGACAGCT<br/>TGGCG<b>TTTAT</b>CAGACCTCAGGACACCTGTAGTGGCCCTGAATAAAACCTCGTTATAGCTC<br/>CTGAAATTAATCCTGAGTAATACTATTATTTGCAT<b>TTTAT</b>TGGGGTTAGTTCAAAGCAT<br/>GTAAAAATAAATATGCCACCA<b>TTTTT</b>GTAAACCTGG<b>TTTGT</b>CA<b>TTTAT</b>CACTTTTTCATA<br/>GGTTGGCGTGGCTCCTAGAGATGTAT<b>TCTTT</b>CGTGCT<b>TATTT</b>TGTGGGAGCAGAAACGGGA</p>                                               |
| <p><b>JUN (4 ATRS sites)</b></p> <p>TGCGAGGATGGAACCTGCGAGGCGAGGGGAGGGGAGCGGG<b>TGTTT</b>GGCCACCACCTCCCT<br/>ACTGTGTAGCCTGGCCACGAAAGAACCAGGATTCCCGACTTCGGGAT<b>TCTTT</b>CCACCAC<br/><b>TTTAT</b>CGGAGTGTCCGCGCCCTTCTGGGCT<b>TGTTT</b>TCCCGAAAGCAACTCGGCGGGATG</p>                                                                                                                                                                                                                                                                                                                                                                                                                                        |
| <p><b>DUSP1 (9 ATRS sites)</b></p> <p><b>TTTTCT</b>AGAAGAATCCAGGCAGAACATTTGCGCAGGCGAAAAACACAAAGCTAAGCGAGG<br/>GGGTGGCGCAA<b>TGTTT</b>A<b>TGTTT</b>GTGTACCCAGCGCTCGCGTCTGCTGAGCAGGCTCCGC<br/>GGGTTGGAGGCCCCAGCCAGCGCTTGTGGGCGCTCACTGTGTATAC<b>TCTTT</b>GT<br/>TGCCCTCCCTGGCTCCAAGTCTTCCGGGGGCCAAAGACTAGGAATAGCAT<b>TATTT</b>CCCCG<br/>GTGGGAGTTTGTCTGCACACTTTCATGGCAAAATGAGAT<b>TATTT</b>TAAGCCACCTTAAA<br/>CGGTCTTGGTAGGGACGACT<b>TTTCT</b>ATCGGCAGAGTTGTTCA<b>TTTTT</b>CTCTAAAACCTCAT<br/>CTTAGGCGCC<b>TATTT</b>GTGCCCCACCCAGTAGTGTGGTTCTGGGCAAGTCAGTCCGCT</p>                                                                                                                                         |

**Table S8:**

Transcription-related proteins identified in immune-precipitation assay followed by shotgun mass spectrometry analysis (data adapted from Mikula et al., 2016)

| Name                                                       | IgG | Pol2-CTD | EGFR | MEK1/2 | ERK1/2 |
|------------------------------------------------------------|-----|----------|------|--------|--------|
| DNA-directed RNA polymerase II subunit RPB1                | 0   | 28       | 9    | 0      | 0      |
| Core histone macro-H2A.1                                   | 0   | 0        | 4    | 0      | 0      |
| DNA replication licensing factor MCM2                      | 0   | 4        | 0    | 0      | 0      |
| DNA replication licensing factor MCM4                      | 0   | 27       | 0    | 0      | 0      |
| DNA replication licensing factor MCM6                      | 0   | 15       | 0    | 0      | 0      |
| DNA replication licensing factor MCM7                      | 0   | 14       | 0    | 0      | 0      |
| DNA topoisomerase 1                                        | 0   | 0        | 2    | 0      | 0      |
| DNA topoisomerase 2-alpha                                  | 0   | 0        | 2    | 0      | 0      |
| DNA-directed RNA polymerase II subunit RPB2                | 0   | 4        | 5    | 0      | 0      |
| DNA-directed RNA polymerase II subunit RPB3                | 0   | 3        | 3    | 0      | 0      |
| DNA-directed RNA polymerases I, II, and III subunit RPABC1 | 0   | 0        | 2    | 0      | 0      |
| Histone H1.2                                               | 0   | 4        | 0    | 0      | 2      |
| Histone H1.3                                               | 0   | 4        | 0    | 0      | 2      |
| Histone H1.4                                               | 0   | 6        | 0    | 0      | 3      |
| Histone H1.5                                               | 0   | 3        | 0    | 0      | 0      |
| Histone H2A type 1                                         | 0   | 5        | 4    | 0      | 2      |
| Histone H2A type 1-A                                       | 0   | 4        | 2    | 0      | 0      |
| Histone H2A type 1-B/E                                     | 0   | 4        | 4    | 0      | 0      |
| Histone H2A type 1-C                                       | 0   | 5        | 4    | 0      | 2      |
| Histone H2A type 1-D                                       | 0   | 4        | 4    | 0      | 0      |
| Histone H2A type 1-H                                       | 0   | 5        | 4    | 0      | 2      |
| Histone H2A type 1-J                                       | 0   | 5        | 4    | 0      | 2      |
| Histone H2A type 2-A                                       | 0   | 5        | 4    | 0      | 2      |
| Histone H2A type 2-C                                       | 0   | 5        | 4    | 0      | 2      |
| Histone H2A type 3                                         | 0   | 4        | 4    | 0      | 0      |
| Histone H2A.J                                              | 0   | 5        | 4    | 0      | 2      |
| Histone H2A.V                                              | 0   | 3        | 3    | 0      | 0      |
| Histone H2A.Z                                              | 0   | 3        | 3    | 0      | 0      |
| Histone H2B type 1-A                                       | 0   | 2        | 2    | 0      | 3      |
| Histone H2B type F-S                                       | 0   | 5        | 4    | 2      | 5      |
| Histone H3.1t                                              | 0   | 0        | 3    | 0      | 0      |
| Histone H3.2                                               | 0   | 0        | 4    | 0      | 0      |
| Histone H3.3                                               | 0   | 0        | 4    | 0      | 0      |
| Histone H3.3C                                              | 0   | 0        | 2    | 0      | 0      |
| Histone H4                                                 | 2   | 6        | 7    | 3      | 3      |
| Putative histone H2B type 2-C                              | 0   | 3        | 3    | 0      | 0      |
| Putative histone H2B type 2-D                              | 0   | 3        | 3    | 0      | 0      |

Note: Numbers in columns are peptides detected from mass spectrometry analysis
